# Supplementary material for: Oriented Insertion of ESR-Containing Hybrid Proteins in Proteoliposomes
Source: MDPI journal article supplement (doi:10.3390/ijms24087369), 2023-04-17
Supplement: s1 [file s1]

## Supplementary Material

### **ORIENTED INSERTION OF ESR-CONTAINING HYBRID PROTEINS IN LIPID MEMBRANES**

Lada E. Petrovskaya<sup>a</sup>, Evgeniy P. Lukashev<sup>b</sup>, Mahir D. Mamedov<sup>c</sup>, Elena A. Kryukova<sup>a</sup>,  
Sergei P. Balashov<sup>d</sup>, Dmitriy A. Dolgikh<sup>a,b</sup>, Andrei B. Rubin<sup>b</sup>,  
Mikhail P. Kirpichnikov<sup>a,b</sup> and Sergey A. Siletsky<sup>c1</sup>

<sup>a</sup>– *Shemyakin & Ovchinnikov Institute of Bioorganic Chemistry, Russian Academy of Sciences, 117997, Moscow, Ul. Miklukho-Maklaya, 16/10, Russian Federation;*

<sup>b</sup>– *Department of Biology, Lomonosov Moscow State University, 119234, Moscow, Leninskie gory, 1, Russian Federation;*

<sup>c</sup>– *Belozersky Institute of Physical-Chemical Biology, Lomonosov Moscow State University, 119991, Moscow, Russian Federation;*

<sup>d</sup>– *Department of Physiology and Biophysics, University of California, Irvine, 92697, USA;*

<sup>1</sup>To whom correspondence should be addressed: Sergey A. Siletsky, Belozersky Institute of Physical-Chemical Biology, Lomonosov Moscow State University, 119991, Moscow, Russian Federation. Tel.: 7-495-939-5549; E-mail: [siletsky@genebee.msu.su](mailto:siletsky@genebee.msu.su).

**Table S1.** Time constants and amplitudes of potential generation and changes of absorbance in the photocycle of wild type **ESR** at pH 7.5 (from [1]).

| Electrogenic phases |         |                 | Absorbance changes in mOD, at |        |        |
|---------------------|---------|-----------------|-------------------------------|--------|--------|
| $\tau$ , ms         | Amp, mV | Contribution, % | $\tau$ , ms                   | 410 nm | 590 nm |
| 0.003               | 0.62    | 1.5             | 0.003                         | -2.1   | 5.6    |
| 0.024               | 0.70    | 1.7             | 0.0139                        | -0.9   | 1.1    |
| 0.1                 | 0.74    | 1.8             | 0.082                         | -3.8   | 0.49   |
| 0.61                | 11.5    | 28              | 0.57                          | 3.1    | -0.2   |
| 3.4                 | 19.1    | 46.5            | 2.6                           | 2.1    | -7.6   |
| 18.4                | 8.4     | 20.5            | 21.6                          | 0.3    | 11.4   |

**Table S2.** Time constants and amplitudes of potential generation and changes of absorbance in the photocycle of **ESR-Cherry** at pH 7.5\*.

| Electrogenic phases |         |                 | Absorbance changes in mOD, at |        |        |
|---------------------|---------|-----------------|-------------------------------|--------|--------|
| $\tau$ , ms         | Amp, mV | Contribution, % | $\tau$ , ms                   | 410 nm | 590 nm |

|        |       |       |       |       |       |
|--------|-------|-------|-------|-------|-------|
| 0.0027 | 0.014 | 2.9   | 0.004 | -0.55 | 12.3  |
| 0.079  | 0.04  | 8.4   | 0.09  | -0.5  | -1.0  |
| 0.37   | -0.08 | -15.4 | 3.4   | 0.8   | -11.4 |
| 1.55   | 0.45  | 88.7  | 23.3  | -0.57 | 14.2  |
| 7.18   | -0.26 | -51   |       |       |       |

**Table S3.** Time constants and amplitudes of potential generation and changes of absorbance in the photocycle of **ESR-Trx** at pH 7.5\*.

| Electrogenic phases |         |                 | Absorbance changes in mOD, at |        |        |
|---------------------|---------|-----------------|-------------------------------|--------|--------|
| $\tau$ , ms         | Amp, mV | Contribution, % | $\tau$ , ms                   | 410 nm | 590 nm |
| 0.001               | -0.003  | -1.0            | 0.005                         | -3.4   | 8.2    |
| 0.028               | 0.02    | 6.7             | 0.128                         | -2.1   | 1.9    |
| 0.94                | -0.049  | -16             | 0.4                           | 2.1    | -3.2   |
| 1.38                | 0.29    | 93.2            | 4.0                           | 1.7    | -16.8  |
| 29                  | -0.075  | -24             | 22.3                          | -0.6   | 26.1   |

**Table S4.** Time constants and amplitudes of potential generation and changes of absorbance in the photocycle of **Caf-ESR** at pH 7.5.

| Electrogenic phases |         |                 | Absorbance changes in mOD, at |        |        |
|---------------------|---------|-----------------|-------------------------------|--------|--------|
| $\tau$ , ms         | Amp, mV | Contribution, % | $\tau$ , ms                   | 410 nm | 590 nm |
| 0.003               | 0.014   | 1.6             | 0.003                         | 0.8    | 8.3    |
| 0.06                | 0.012   | 1.4             | 0.054                         | -0.5   | -0.4   |
| 1.58                | 0.51    | 61              | 3.0                           | 0.6    | -6.0   |
| 17.6                | 0.31    | 36.4            | 19.7                          | -0.3   | 10.4   |

\*Negative amplitudes in % were calculated from the sum of the positive amplitudes taken as 100%.

**Table S5.** Time constants and amplitudes of potential generation of the hybrid proteins at pH 6.5\*.

| Protein | $\tau_1$ | A1    | $\tau_2$ | A2     | $\tau_3$ | A3    | $\tau_4$ | A4     | $\tau_5$ | A5    | $\tau_6$ | A6     |
|---------|----------|-------|----------|--------|----------|-------|----------|--------|----------|-------|----------|--------|
| wt      | 0.0042   | 2.1%  | 0.58     | 37%    | 1.28     | -32%  | 4.87     | 38%    | 14.3     | 22%   | 648      | -80%   |
| ESR**   | 0.032    | 1.1%  |          |        |          |       |          |        |          |       |          |        |
| ESR-Trx | 0.38     | 0.108 | 0.96     | -0.171 | 2.49     | 0.146 | 40.55    | -0.119 | 213      | 0.204 | 475      | -0.171 |

|         |        |        |      |       |   |       |     |       |       |       |     |       |
|---------|--------|--------|------|-------|---|-------|-----|-------|-------|-------|-----|-------|
|         |        | 23.6%  |      | -     |   | 31.9% |     | -26%  |       | 44.5% |     | -     |
|         |        |        |      | 37.3% |   |       |     |       |       |       |     | 37.3% |
| Caf-ESR | 0.0031 | 0.0030 | 0.29 | 0.048 | - | -     | 4.2 | 0.122 | 16.59 | 0.085 | 400 | -0.3  |
|         |        | 1.16%  |      | 18.6% |   |       |     | 47.3% |       | 33%   |     | -116% |

\*\*From [2] with modifications.

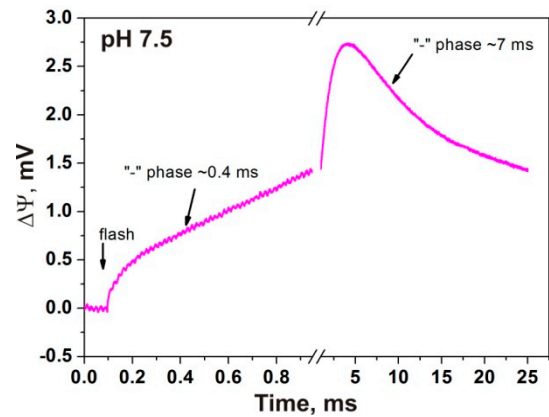

**Figure S1.** Kinetics of light-induced changes in membrane potential difference,  $\Delta\Psi$ , in proteoliposomes containing ESR-Cherry at pH 7.5.

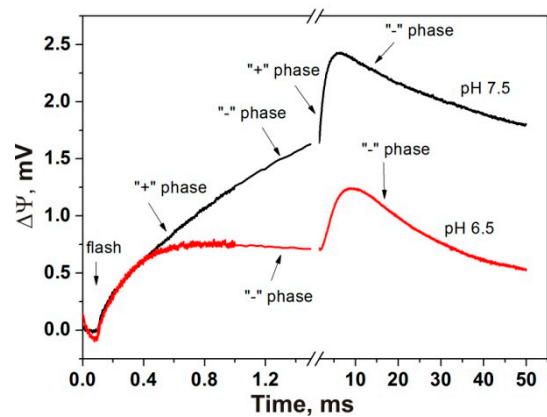

**Figure S2.** Kinetics of light-induced changes in membrane potential difference,  $\Delta\Psi$ , in proteoliposomes containing ESR-Trx at pH 7.5 and 6.5.

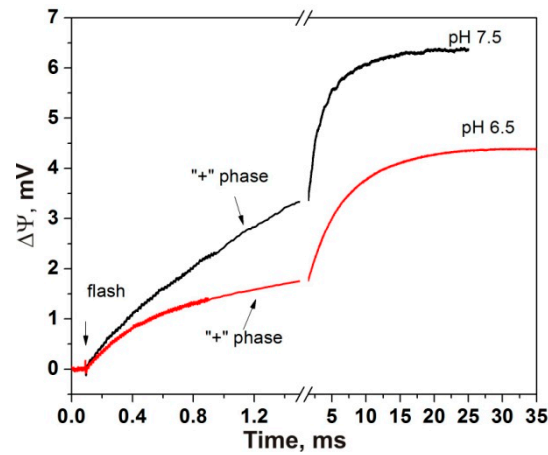

**Figure S3.** Kinetics of light-induced changes in membrane potential difference,  $\Delta\Psi$ , in proteoliposomes containing Caf-ESR at pH 7.5 and 6.5.

## References

- [1] S.A. Siletsky, M.D. Mamedov, E.P. Lukashev, S.P. Balashov, D.A. Dolgikh, A.B. Rubin, M.P. Kirpichnikov, L.E. Petrovskaya, Elimination of proton donor strongly affects directionality and efficiency of proton transport in ESR, a light-driven proton pump from *Exiguobacterium sibiricum*, *Biochim. Biophys. Acta (BBA)-Bioenergetics*, 1860 (2019) 1-11.
- [2] S.A. Siletsky, M.D. Mamedov, E.P. Lukashev, S.P. Balashov, D.A. Dolgikh, A.B. Rubin, M.P. Kirpichnikov, L.E. Petrovskaya, Electrogenic steps of light-driven proton transport in ESR, a retinal protein from *Exiguobacterium sibiricum*, *Biochim. Biophys. Acta (BBA)-Bioenergetics*, 1857 (2016) 1741-1750.
